# Supplementary material for: Growth of SnO2 nanocrystals co-doped with Eu3+ for highly enhanced photoluminescence in mesoporous silica glasses
Source: Royal Society of Chemistry journal article supplement (doi:10.1039/c8tc04457k), 2019-01-01
Supplement: c8tc04457k1.pdf [file c8tc04457k1.pdf]

## Supporting Information

### **Growth of SnO<sub>2</sub> nanocrystals co-doped with Eu<sup>3+</sup> for highly enhanced photoluminescence in mesoporous silica glasses**

#### **1. Synthesis of Eu<sup>3+</sup> doped SnO<sub>2</sub> powder**

Eu<sup>3+</sup> doped SnO<sub>2</sub> powder was prepared by a simple co-precipitation method.<sup>1,2</sup> EuCl<sub>3</sub>·6H<sub>2</sub>O (99.99%) and SnCl<sub>4</sub>·5H<sub>2</sub>O (99.995%) were dissolved in deionized water. The original molar ratio of Eu<sup>3+</sup> to Sn<sup>4+</sup> is 5%. The mixture was stirred for about 1 hour to become homogenous solution. Ammonium hydroxide (NH<sub>3</sub> · H<sub>2</sub>O) as the precipitator was added in the solution until the PH reach 8. The final solution was stirred for 3 hours at 80 °C and followed a filtration. The obtained precursor was thoroughly washed, dried at 50 °C and annealed at 1000 °C for 3 hours. Finally, the Eu<sup>3+</sup> doped SnO<sub>2</sub> powder was formed.

#### **2. Supplementary Tables**

**Table S1. Dopants Concentration of the synthesized samples with different concentration of Eu<sup>3+</sup>**

| Samples | dopants (mol/L)                      |  |
|---------|--------------------------------------|--|
|         | EuCl <sub>3</sub> •6H <sub>2</sub> O |  |
| Eu 0    | 0                                    |  |
| Eu 0.05 | 0.05                                 |  |
| Eu 0.15 | 0.15                                 |  |
| Eu 0.20 | 0.20                                 |  |
| Eu 0.25 | 0.25                                 |  |
| Eu 0.30 | 0.30                                 |  |

**Table S2. Dopants Concentration of the synthesized samples with different concentration of SnO<sub>2</sub> NCs**

| Samples | dopants (mol/L)                      |                                      |
|---------|--------------------------------------|--------------------------------------|
|         | EuCl <sub>3</sub> •6H <sub>2</sub> O | SnCl <sub>4</sub> •5H <sub>2</sub> O |
| Sn 0    | 0.20                                 | 0                                    |
| Sn 0.20 | 0.20                                 | 0.20                                 |
| Sn 0.40 | 0.20                                 | 0.40                                 |
| Sn 0.60 | 0.20                                 | 0.60                                 |

**Table S3. Dopants Concentration of Sn 0.40 single-doped glasses and the sample co-doped with very low Eu<sup>3+</sup> ions**

| Samples              | dopants (mol/L)                      |                                      |
|----------------------|--------------------------------------|--------------------------------------|
|                      | EuCl <sub>3</sub> ·6H <sub>2</sub> O | SnCl <sub>4</sub> ·5H <sub>2</sub> O |
| Sn 0.40 single-doped | 0                                    | 0.40                                 |
| Sn 0.40 Eu 0.0005    | 0.0005                               | 0.40                                 |

### 3. Supplementary Figures

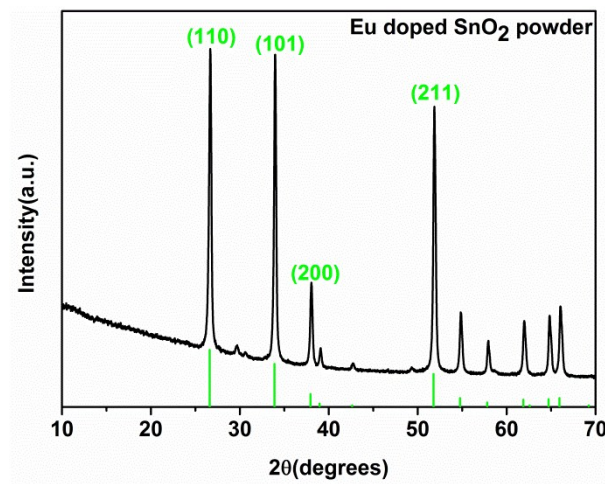

Fig. S1 XRD patterns of Eu doped SnO<sub>2</sub> powder

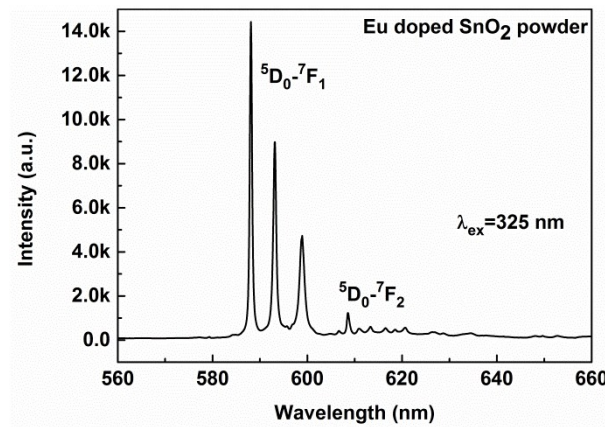

Fig. S2 PL spectra of Eu doped SnO<sub>2</sub> powder excited at 325 nm

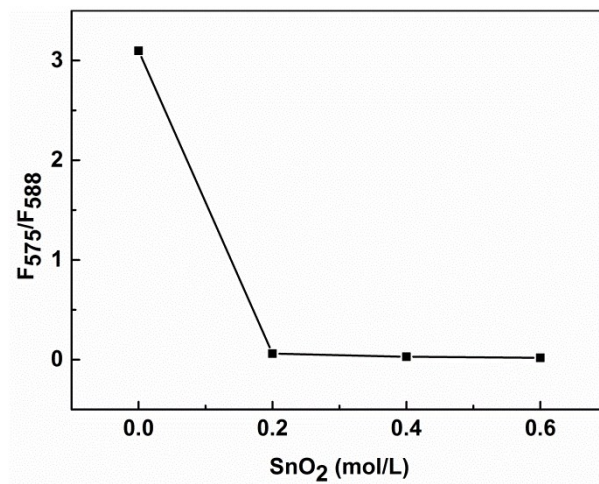

Fig. S3 The ratio of PL emission intensity at 575 nm and 588 nm ( $F_{575}/F_{588}$ ) as a function of SnO<sub>2</sub> NCs concentration

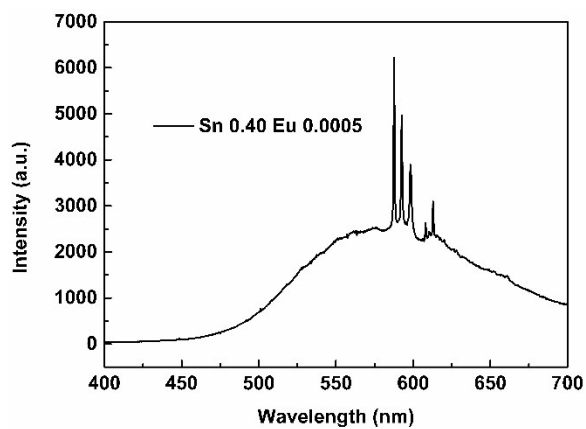

Fig. S4 PL emission spectra of Sn 0.40 Eu 0.0005 excited by 325 nm

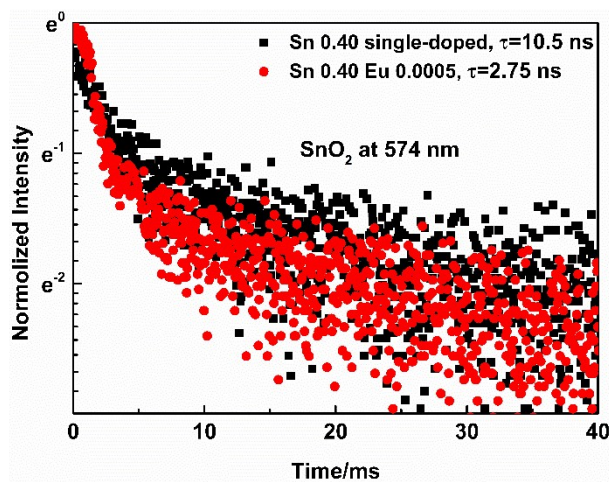

Fig.S5 PL decay curves of Sn 0.40 single-doped and Sn 0.40 Eu 0.0005 at 574 nm of SnO<sub>2</sub>

NCs excited by 325 nm

#### References

1. D.-S. Lee, J.-K. Jung, J.-W. Lim, J.-S. Huh and D.-D. Lee, *Sensors and Actuators B: Chemical*, 2001, **77**, 228-236.
2. A. Bouaine, N. Brihi, G. Schmerber, C. Ulhaq-Bouillet, S. Colis and A. Dinia, *The Journal of Physical Chemistry C*, 2007, **111**, 2924-2928.
